# Supplementary material for: The promastigote surface antigen gene family of the Leishmania parasite: differential evolution by positive selection and recombination
Source: PubMed Central journal article supplement (PMC2584048; doi:10.1186/1471-2148-8-292), 2008-10-24

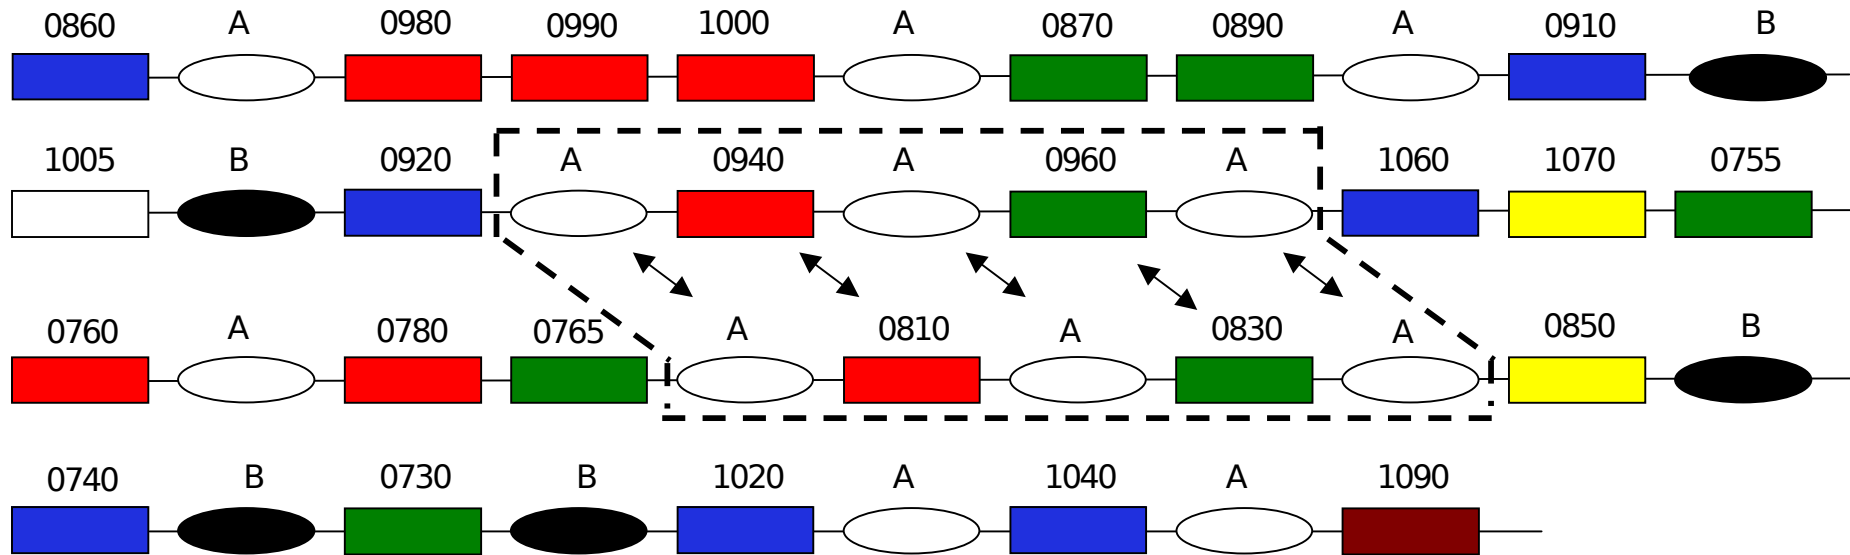

Supplement: 1471-2148-8-292-S10.pdf [file 1471-2148-8-292-S10.pdf]
